# Supplementary material for: AIn3Si4P9 (A = Ca, Sr): quaternary phosphides with double-helix structures exhibiting high laser-induced damage thresholds
Source: Royal Society of Chemistry journal article supplement (doi:10.1039/d2qi02346f), 2022-12-19
Supplement: d2qi02346f1.pdf [file d2qi02346f1.pdf]

## Electronic Supporting Information

### **$\text{AlnSi}_4\text{P}_9$ (A = Ca, Sr): Quaternary Phosphides with Double-Helix Structures Exhibiting High Laser-Induced Damage Thresholds**

*Ming-Shu Zhang,<sup>a,b</sup> Bin-Wen Liu,<sup>a\*</sup> Xiao-Ming Jiang,<sup>a</sup> and Guo-Cong Guo<sup>a\*</sup>*

<sup>a</sup> State Key Laboratory of Structural Chemistry, Fujian Institute of Research on the Structure of Matter, Chinese Academy of Sciences, Fuzhou, Fujian 350002, P. R. China

<sup>b</sup> University of Chinese Academy of Sciences, Beijing 100190, P. R. China

\* Guo-Cong Guo: gcguo@fjirsm.ac.cn; Bin-Wen Liu: bwliu@fjirsm.ac.cn.

## Table of Contents

|                                                                                                                                                                                    |          |
|------------------------------------------------------------------------------------------------------------------------------------------------------------------------------------|----------|
| <b>1. Figures and Tables.....</b>                                                                                                                                                  | <b>3</b> |
| <b>Fig. S1</b> EDS of single crystal of <b>1</b> (a) and <b>2</b> (b). .....                                                                                                       | 3        |
| <b>Fig. S2</b> IR spectra of <b>1</b> and <b>2</b> .....                                                                                                                           | 3        |
| <b>Fig. S3</b> Frequency-dependent refractive indexes of <b>1</b> (a) and <b>2</b> (b) along<br>symmetry-independent <i>a</i> and <i>c</i> axes. ....                              | 4        |
| <b>Fig. S4</b> Calculated birefringence of <b>1</b> (a) and <b>2</b> (b).....                                                                                                      | 4        |
| <b>Table S1</b> Crystal data and structure refinement results for <b>1</b> and <b>2</b> .....                                                                                      | 5        |
| <b>Table S2</b> Fractional atomic coordinates ( $\times 10^4$ ) and equivalent isotropic<br>displacement parameters ( $\text{\AA}^2 \times 10^3$ ) for <b>1</b> and <b>2</b> ..... | 5        |
| <b>Table S3</b> Selected distances ( $\text{\AA}$ ) for <b>1</b> and <b>2</b> .....                                                                                                | 6        |
| <b>Table S4</b> Selected angles for <b>1</b> and <b>2</b> . ....                                                                                                                   | 7        |

## 1. Figures and Tables.

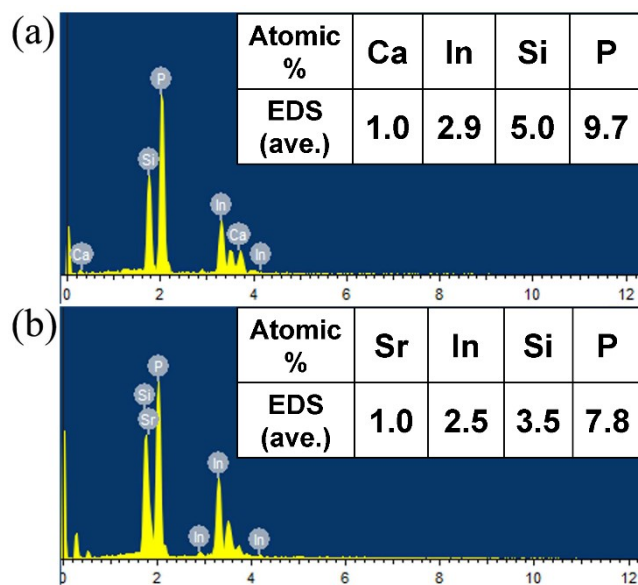

Fig. S1 EDS of single crystal of **1** (a) and **2** (b).

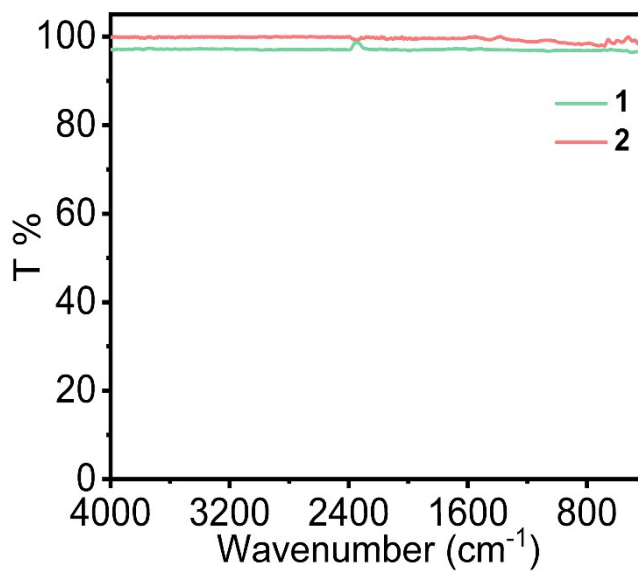

Fig. S2 IR spectra of **1** and **2**.

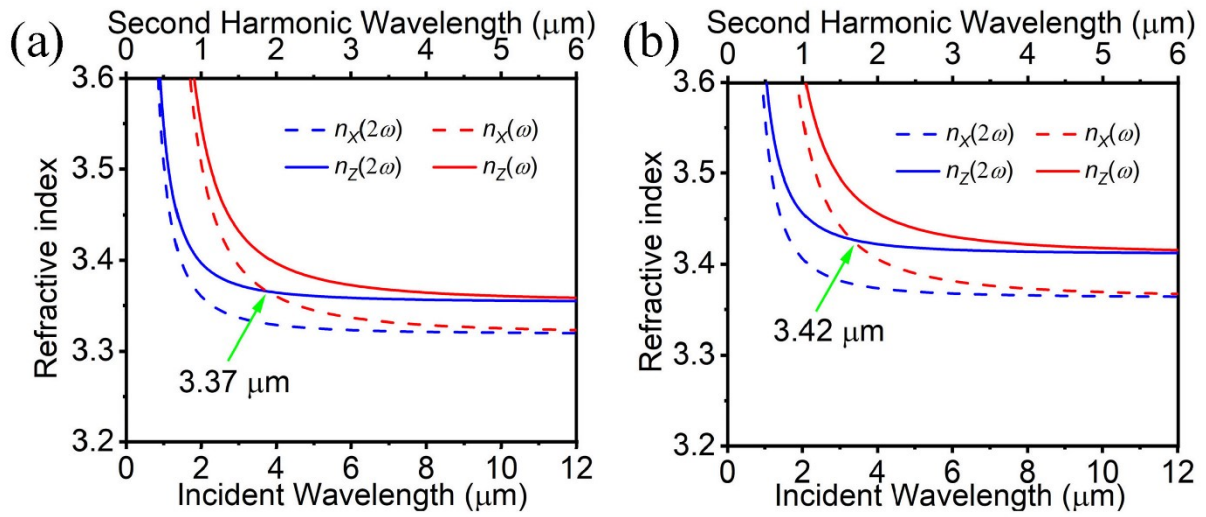

**Fig. S3** Frequency-dependent refractive indexes of **1** (a) and **2** (b) along symmetry-independent  $a$  and  $c$  axes.

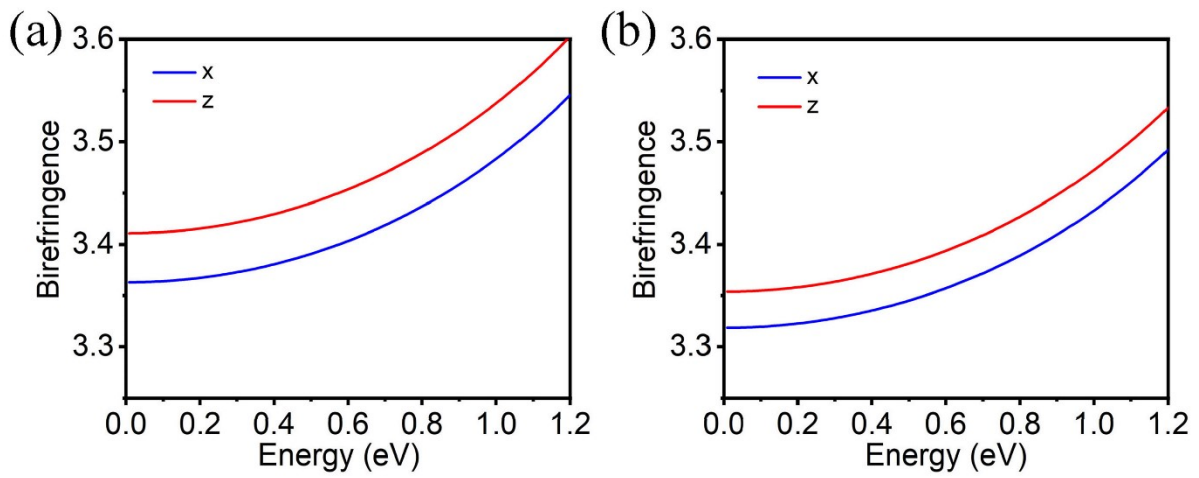

**Fig. S4** Calculated birefringence of **1** (a) and **2** (b).

**Table S1** Crystal data and structure refinement results for **1** and **2**.

| Empirical formula                                                         | CaIn <sub>3</sub> Si <sub>4</sub> P <sub>9</sub> ( <b>1</b> ) | SrIn <sub>3</sub> Si <sub>4</sub> P <sub>9</sub> ( <b>2</b> ) |
|---------------------------------------------------------------------------|---------------------------------------------------------------|---------------------------------------------------------------|
| CCDC                                                                      | 2124618                                                       | 2124617                                                       |
| Fw                                                                        | 775.63                                                        | 823.17                                                        |
| Temperature (K)                                                           | 293(2)                                                        | 293(2)                                                        |
| Space group                                                               | <i>P4<sub>1</sub>2<sub>1</sub>2</i>                           | <i>P4<sub>1</sub>2<sub>1</sub>2</i>                           |
| <i>a</i> (Å)                                                              | 12.2959(3)                                                    | 12.4702(3)                                                    |
| <i>b</i> (Å)                                                              | 12.2959(3)                                                    | 12.4702(3)                                                    |
| <i>c</i> (Å)                                                              | 9.7043(4)                                                     | 9.6358(4)                                                     |
| Volume (Å <sup>3</sup> )                                                  | 1467.18(12)                                                   | 1498.42(10)                                                   |
| Z                                                                         | 1                                                             | 1                                                             |
| <i>D</i> <sub>calcd</sub> (g cm <sup>-3</sup> )                           | 3.511                                                         | 3.649                                                         |
| $\mu$ (mm <sup>-1</sup> )                                                 | 6.301                                                         | 9.348                                                         |
| GOF on <i>F</i> <sup>2</sup>                                              | 1.002                                                         | 1.049                                                         |
| <i>R</i> <sub>1</sub> <sup>a</sup> ( <i>I</i> > 2 $\sigma$ ( <i>I</i> ))  | 0.0477                                                        | 0.0326                                                        |
| <i>wR</i> <sub>2</sub> <sup>b</sup> ( <i>I</i> > 2 $\sigma$ ( <i>I</i> )) | 0.1723                                                        | 0.0826                                                        |
| <i>R</i> <sub>1</sub> <sup>a</sup> (all data)                             | 0.0542                                                        | 0.0347                                                        |
| <i>wR</i> <sub>2</sub> <sup>b</sup> (all data)                            | 0.1921                                                        | 0.0840                                                        |
| Flack                                                                     | 0.06(3)                                                       | 0.00(3)                                                       |
| $\Delta\rho_{\max}/\Delta\rho_{\min}$ (e Å <sup>-3</sup> )                | 3.77/-3.65                                                    | 1.29/-2.13                                                    |

$$^a R = \sum ||F_o| - |F_c| | / \sum |F_o|, \quad ^b wR = (\sum (w(F_o^2 - F_c^2)^2) / \sum (w(F_o^2)^2))^{1/2}.$$

**Table S2** Fractional atomic coordinates ( $\times 10^4$ ) and equivalent isotropic displacement parameters (Å<sup>2</sup>  $\times 10^3$ ) for **1** and **2**.

| <b>1</b> |            |            |            |          |
|----------|------------|------------|------------|----------|
| Atom     | x          | y          | z          | U(eq)    |
| Ca1      | 5766(3)    | 5766(3)    | 0          | 27.4(12) |
| In1      | 3334.2(8)  | 327.3(9)   | 4734.5(11) | 15.2(4)  |
| In2      | 3606.3(10) | 3606.3(10) | 0          | 24.4(5)  |

|     |         |         |         |         |
|-----|---------|---------|---------|---------|
| Si1 | 2152(3) | 1234(3) | 1472(4) | 9.2(8)  |
| Si2 | 1006(3) | 3788(3) | 1590(3) | 3.1(7)  |
| P1  | 2584(3) | 2986(3) | 2075(4) | 12.8(8) |
| P2  | 4639(3) | 1909(3) | 4672(4) | 10.5(7) |
| P3  | 3812(3) | 635(3)  | 720(3)  | 6.4(7)  |
| P4  | 845(3)  | 845(3)  | 0       | 9.8(10) |
| P5  | 1583(3) | 471(4)  | 3400(4) | 20.4(9) |

**2**

| Atom | x          | y          | z         | U(eq)   |
|------|------------|------------|-----------|---------|
| Sr1  | 5824.5(10) | 5824.5(10) | 0         | 22.3(4) |
| In1  | 3614.8(7)  | 3614.8(7)  | 0         | 18.1(3) |
| In2  | 3353.6(6)  | 309.6(7)   | 4702.4(8) | 11.9(2) |
| Si1  | 2164(2)    | 1271(2)    | 1504(3)   | 8.1(6)  |
| Si2  | 1041(2)    | 3818(2)    | 1626(3)   | 1.6(5)  |
| P1   | 4671(2)    | 1829(2)    | 4672(3)   | 10.8(5) |
| P2   | 3788(2)    | 660(2)     | 718(3)    | 7.2(5)  |
| P3   | 2583(2)    | 2996(2)    | 2114(3)   | 12.5(6) |
| P4   | 1617(2)    | 489(3)     | 3420(3)   | 15.0(6) |
| P5   | 900(2)     | 900(2)     | 0         | 10.3(8) |

**Table S3** Selected distances (Å) for **1** and **2**.

**1**

**6**

| Bond     | Distances | Bond   | Distances |
|----------|-----------|--------|-----------|
| In1-P2   | 2.530(4)  | Si1-P5 | 2.206(5)  |
| In1-P2   | 2.522(4)  | Si1-P3 | 2.290(5)  |
| In1-P3   | 2.691(4)  | Si1-P4 | 2.202(5)  |
| In1-P5   | 2.519(4)  | Si2-P2 | 2.290(5)  |
| In2-P1×2 | 2.493(4)  | Si2-P3 | 2.290(4)  |
| In2-P5×2 | 2.465(5)  | Si2-P1 | 2.227(5)  |
| Si1-P1   | 2.295(5)  | Si2-P3 | 2.288(5)  |

**2**

| Bond     | Distances | Bond   | Distances |
|----------|-----------|--------|-----------|
| In1-P3×2 | 2.530(3)  | Si1-P3 | 2.291(4)  |
| In1-P4×2 | 2.516(3)  | Si1-P4 | 2.191(4)  |
| In2-P1   | 2.507(3)  | Si2-P1 | 2.217(4)  |
| In2-P1   | 2.520(3)  | Si2-P2 | 2.309(4)  |
| In2-P2   | 2.675(3)  | Si2-P3 | 2.311(4)  |
| In2-P4   | 2.504(3)  | Si2-P3 | 2.230(4)  |
| Si1-P2   | 2.292(4)  |        |           |

**Table S4** Selected angles for **1** and **2**.

**1**

| Atom-Atom-Atom | Angle/°   | Atom-Atom-Atom | Angle/°    |
|----------------|-----------|----------------|------------|
| P5-Si1-P4      | 103.8(16) | P4-In1-P4      | 109.71(14) |

|           |             |           |            |
|-----------|-------------|-----------|------------|
| P5-Si1-P3 | 122.16(16)  | P4-In1-P3 | 120.57(9)  |
| P4-Si1-P3 | 105.77(15)  | P4-In1-P3 | 98.84(9)   |
| P5-Si1-P2 | 110.33 (13) | P4-In1-P3 | 98.84(9)   |
| P4-Si1-P2 | 113.86(16)  | P4-In1-P3 | 120.57(9)  |
| P3-Si1-P2 | 101.27(15)  | P3-In1-P3 | 109.77(14) |
| P1-Si2-P3 | 112.78(15)  | P4-In2-P1 | 119.56(10) |
| P1-Si2-P2 | 110.29(14)  | P4-In2-P1 | 114.61(9)  |
| P3-Si2-P2 | 112.13(15)  | P1-In2-P1 | 108.00(11) |
| P1-Si2-P2 | 113.50(15)  | P4-In2-P2 | 101.39(10) |
| P3-Si2-P2 | 111.33(15)  | P1-In2-P2 | 103.19(9)  |
| P2-Si2-P2 | 95.66(14)   | P1-In2-P2 | 108.78(9)  |

**2**

| Atom-Atom-Atom | Angle/°    | Atom-Atom-Atom | Angle/°    |
|----------------|------------|----------------|------------|
| P4-Si1-P5      | 103.1(2)   | P5-In1-P2      | 118.51(14) |
| P4-Si1-P3      | 111.93(17) | P5-In1-P2      | 113.79(12) |
| P5-Si1-P3      | 114.6(2)   | P2-In1-P2      | 110.83(14) |
| P4-Si1-P1      | 122.56(19) | P5-In1-P3      | 99.81(13)  |
| P5-Si1-P1      | 104.9(2)   | P2-In1-P3      | 102.78(12) |
| P3-Si1-P1      | 100.16(19) | P2-In1-P3      | 109.56(11) |
| P1-Si2-P2      | 111.83(19) | P5-In2-P5      | 107.54(19) |
| P1-Si2-P3      | 112.75(18) | P5-In2-P1      | 98.84(12)  |
| P2-Si2-P3      | 112.41(18) | P5-In2-P1      | 121.55(12) |



|           |            |           |            |
|-----------|------------|-----------|------------|
| P1-Si2-P3 | 109.69(19) | P5-In2-P1 | 121.55(12) |
| P2-Si2-P3 | 114.20(18) | P5-In2-P1 | 98.84(12)  |
| P3-Si2-P3 | 94.92(17)  | P1-In2-P1 | 110.12(18) |

---
